# Supplementary material for: A multi-binding site hydrazone-based chemosensor for Zn(ii) and Cd(ii): a new strategy for the detection of metal ions in aqueous media based on aggregation-induced emission
Source: Royal Society of Chemistry journal article supplement (doi:10.1039/d0dt04062b), 2020-12-22
Supplement: d0dt04062b1.pdf [file d0dt04062b1.pdf]

## Supporting Information

### A multi-binding site hydrazone-based chemosensor for Zn(II) and Cd(II) : A new strategy for detection of metal ions based on aggregation- induced emission

Min Wu, Dong-Dong Yang, Han-Wen Zheng, Qiong-Fang Liang, Jia-Bin Li, Yang Kang, Sai Li, Chen Jiao, Xiang-Jun Zheng\* and Lin-Pei Jin

Beijing Key Laboratory of Energy Conversion and Storage Materials, College of Chemistry, Beijing Normal University, Beijing 100875, China

### Contents

|                                                                                                                                                                                                                                                                                                                                                                                                                                                                                                                                |    |
|--------------------------------------------------------------------------------------------------------------------------------------------------------------------------------------------------------------------------------------------------------------------------------------------------------------------------------------------------------------------------------------------------------------------------------------------------------------------------------------------------------------------------------|----|
| <b>Experimental details</b> .....                                                                                                                                                                                                                                                                                                                                                                                                                                                                                              | 2  |
| <b>General materials and apparatus</b> .....                                                                                                                                                                                                                                                                                                                                                                                                                                                                                   | 2  |
| <b>Synthesis of H<sub>3</sub>L, complexes of Zn(II) and Cd(II)</b> .....                                                                                                                                                                                                                                                                                                                                                                                                                                                       | 2  |
| <b>Scheme S1</b> Synthesis route of H <sub>3</sub> L, Zn(II) complex <b>1</b> and Cd(II) complex <b>2</b> .....                                                                                                                                                                                                                                                                                                                                                                                                                | 2  |
| <b>Fig.S1</b> (a) Fluorescence spectra and (b) the maximum emission intensity change of H <sub>3</sub> L (100 μM) in THF/H <sub>2</sub> O solvents containing 100–10% THF and 0–90% water, λ <sub>ex</sub> =400 nm. ....                                                                                                                                                                                                                                                                                                       | 4  |
| <b>Fig.S2</b> (a) Fluorescence spectra of H <sub>3</sub> L and Zn <sup>2+</sup> in THF/H <sub>2</sub> O (v/v, 2/8), the total concentration of Zn <sup>2+</sup> and H <sub>3</sub> L was 100 μM, λ <sub>ex</sub> =440 nm; (b) Job's plot of Zn <sup>2+</sup> vs H <sub>3</sub> L in THF/H <sub>2</sub> O (v/v, 2/8), λ <sub>em</sub> =560 nm.....                                                                                                                                                                              | 4  |
| <b>Fig.S3</b> Association constant calculations by plotting (F <sub>max</sub> -F <sub>min</sub> ) <sup>2</sup> /[(F <sub>max</sub> - F <sub>min</sub> )(F- F <sub>min</sub> )] vs 1/[Zn <sup>2+</sup> ] with linear fitting as well to find out the binding constant of H <sub>3</sub> L (100 μM) with Zn <sup>2+</sup> , H <sub>3</sub> L and Zn <sup>2+</sup> assuming 2:1 stoichiometry for association in THF/ H <sub>2</sub> O (v/v=2/8) solvent, λ <sub>ex</sub> =440 nm, λ <sub>em</sub> =560 nm. ....                  | 4  |
| <b>Fig.S4</b> (a) The standard deviation of the blank measurement was determined by measuring the emission intensity of the H <sub>3</sub> L in THF/H <sub>2</sub> O (v/v=2/8) without metal ions ten times. (b)The detection limit of H <sub>3</sub> L (100 μM) for Zn <sup>2+</sup> was calculated by 3σ/m formula based on the fluorescence titration data. ....                                                                                                                                                            | 5  |
| <b>Fig.S5</b> (a) Fluorescence spectra and (b) the maximum emission intensity change of H <sub>3</sub> L (100 μM) in THF/ HEPES solvents containing 100–10% THF and 0–90% HEPES buffer (water solution, 20 mM, pH = 7.42), λ <sub>ex</sub> =430 nm....                                                                                                                                                                                                                                                                         | 5  |
| <b>Fig.S6</b> (a) Fluorescence spectra of H <sub>3</sub> L and Cd <sup>2+</sup> in THF/ HEPES aqueous buffer(v/v, 3/7) solvent, the total concentration of Cd <sup>2+</sup> and H <sub>3</sub> L was 100 μM, λ <sub>ex</sub> =430 nm; (b) Job's plot of Cd <sup>2+</sup> vs H <sub>3</sub> L in THF/HEPES (v/v, 3/7), λ <sub>em</sub> =645 nm. ....                                                                                                                                                                            | 5  |
| <b>Fig.S7</b> Association constant calculations by plotting (F <sub>max</sub> -F <sub>min</sub> ) <sup>2</sup> /[(F <sub>max</sub> - F <sub>min</sub> )(F- F <sub>min</sub> )] vs 1/[Cd <sup>2+</sup> ] <sup>2</sup> with linear fitting as well to find out the binding constant of H <sub>3</sub> L (100 μM) with Cd <sup>2+</sup> , H <sub>3</sub> L and Cd <sup>2+</sup> assuming 2:2 stoichiometry for association in THF/ HEPES aqueous buffer (v/v, 3/7) solvent, λ <sub>ex</sub> =430 nm, λ <sub>em</sub> =645 nm..... | 6  |
| <b>Fig.S8</b> (a) The standard deviation of the blank measurement was determined by measuring the emission intensity of the H <sub>3</sub> L in THF/HEPES (v/v, 3/7) without metal ions ten times. (b)The detection limit of H <sub>3</sub> L (100 μM) for Cd <sup>2+</sup> was calculated by 3σ/m formula based on the fluorescence titration data. ....                                                                                                                                                                      | 6  |
| <b>Fig.S9</b> Intramolecular and intermolecular interactions observed in H <sub>3</sub> L.....                                                                                                                                                                                                                                                                                                                                                                                                                                 | 6  |
| <b>Fig.S10</b> The "head to tail" molecular packing directed by the O-H···O, C-H···O and C-H···π intermolecular interactions in the Zn (II) complex <b>1</b> ; (a)N-H···O intramolecular hydrogen bond, O-H···O and C-H···O intermolecular interactions (b)O-H···O and C-H···π intermolecular interactions observed in the Zn (II) complex <b>1</b> . ....                                                                                                                                                                     | 7  |
| <b>Fig.S11</b> PXRD of Cd (II) complex polycrystals and Cd-H <sub>3</sub> L aggregates.....                                                                                                                                                                                                                                                                                                                                                                                                                                    | 7  |
| <b>Table.S1</b> Crystal data and structure refinement parameters of H <sub>3</sub> L, complex ( <b>1</b> ) and ( <b>2</b> ) .....                                                                                                                                                                                                                                                                                                                                                                                              | 8  |
| <b>Table.S2</b> Selected bond distances (Å) and angles (°) for H <sub>3</sub> L.....                                                                                                                                                                                                                                                                                                                                                                                                                                           | 9  |
| <b>Table.S3</b> Selected bond distances (Å) and angles (°) for Zn(II) complex ( <b>1</b> ) .....                                                                                                                                                                                                                                                                                                                                                                                                                               | 10 |
| <b>Table.S4</b> Selected bond distances (Å) and angles (°) for Cd(II) complex ( <b>2</b> ) .....                                                                                                                                                                                                                                                                                                                                                                                                                               | 11 |
| <b>Table.S5</b> Intramolecular and intermolecular interactions for H <sub>3</sub> L .....                                                                                                                                                                                                                                                                                                                                                                                                                                      | 12 |
| <b>Table.S6</b> Intramolecular and intermolecular interactions for Zn(II) complex ( <b>1</b> ) .....                                                                                                                                                                                                                                                                                                                                                                                                                           | 12 |
| <b>References</b> .....                                                                                                                                                                                                                                                                                                                                                                                                                                                                                                        | 12 |

## Experimental details

### General materials and apparatus

All reagents and solvents (analytical and spectroscopic grade) were provided by commercial suppliers and used as received. Solutions of metal ions were prepared from LiCl, NaCl, KNO<sub>3</sub>, CaCl<sub>2</sub>, MgCl<sub>2</sub>·6H<sub>2</sub>O, Al(ClO<sub>4</sub>)<sub>3</sub>·9H<sub>2</sub>O, CrCl<sub>3</sub>·6H<sub>2</sub>O, Mn(ClO<sub>4</sub>)<sub>2</sub>·6H<sub>2</sub>O, FeCl<sub>3</sub>, Co(ClO<sub>4</sub>)<sub>2</sub>·6H<sub>2</sub>O, Ni(ClO<sub>4</sub>)<sub>2</sub>·6H<sub>2</sub>O, Cu(ClO<sub>4</sub>)<sub>2</sub>·6H<sub>2</sub>O, Zn(Ac)<sub>2</sub>·2H<sub>2</sub>O, Cd(Ac)<sub>2</sub>·2H<sub>2</sub>O, Hg(ClO<sub>4</sub>)<sub>2</sub>·3H<sub>2</sub>O and Pb(ClO<sub>4</sub>)<sub>2</sub>·3H<sub>2</sub>O. Elemental analyses (CHN) were conducted using a Vario EL elemental analyzer. Fourier transform infrared (FT-IR) spectra were recorded on an Avatar 360 FT-IR spectrometer using KBr pellets in 4000-400 cm<sup>-1</sup>. The <sup>1</sup>H NMR spectra were obtained on JEOL JNM-ECX600P (400 MHz) spectrometers with TMS as internal standard. Single crystal X-ray diffraction data were collected on an Oxford Diffraction SuperNova area-detector diffractometer using mirror optics monochromated Cu-Kα radiation (λ = 1.54184 Å) at low temperature (100 K). CrysAlisPro was used for the data collection, data reduction and empirical absorption correction. The structures were solved with the ShelXT<sup>1</sup> (direct methods) structure solution program and refined with the ShelXL<sup>2</sup> (Least Squares minimization) in the Olex2 package<sup>3</sup>. Fluorescence spectra were measured on a FS5 fluorescence spectrophotometer, with a xenon lamp as the excitation light source and a quartz cuvette (path length = 1.0 cm). The dynamic light scattering (DLS) data were carried out by Brookhaven ZetaPlus Zeta Potential Analyzer. The morphologies of the samples were investigated by the field emission scanning electron microscope (FE-SEM, HITACHI, SU8010).

### Synthesis of H<sub>3</sub>L, complexes of Zn(II) and Cd(II)

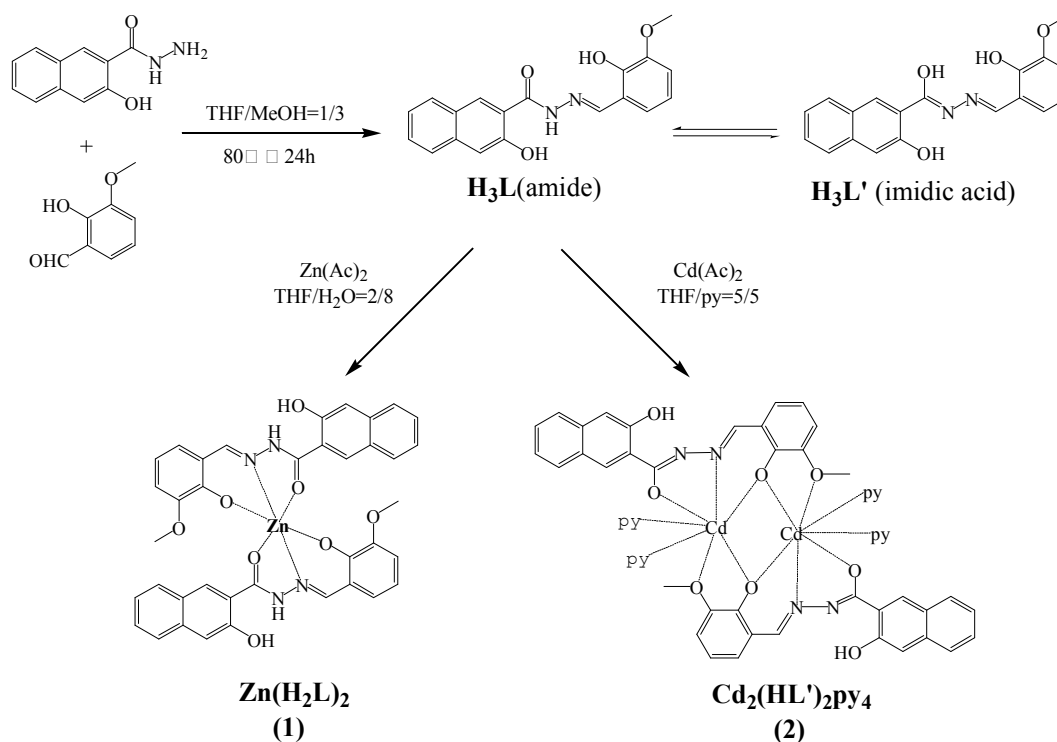

**Scheme S1** Synthesis route of H<sub>3</sub>L, Zn(II) complex **1** and Cd(II) complex **2**.

Synthesis of H<sub>3</sub>L (N-(3-methoxy-2-hydroxybenzylidene)-3-hydroxy-2-naphthahydrazone, C<sub>19</sub>H<sub>16</sub>N<sub>2</sub>O<sub>4</sub>): A mixture of 3-hydroxy-2-naphthoic acid hydrazide (0.0202 g, 0.1 mmol), 2-hydroxy-3-methoxybenzaldehyde (0.0152 g, 0.1 mmol), 2 ml tetrahydrofuran and 5 ml methanol was sealed in a 25 mL Teflon-lined autoclave and

heated at 80 °C for 24 h, cooled to room temperature. Colorless needle crystals (**H<sub>3</sub>L**) suitable for X-ray crystallography were obtained, washed three times with methanol and filtered, and air-dried to obtain 0.0309 g of **H<sub>3</sub>L** in a yield of 92.00%. Anal. Calcd for C<sub>19</sub>H<sub>16</sub>N<sub>2</sub>O<sub>4</sub> (**H<sub>3</sub>L**) (%): C, 67.85; H, 4.79; N, 8.33. Found: C, 67.96; H, 4.70; N, 8.32. IR for **H<sub>3</sub>L** (KBr pellet, cm<sup>-1</sup>): 3424w, 3173s, 2950w, 2322w, 1645s, 1630vs, 1611s, 1555s, 1506w, 1470w, 1452m, 1387w, 1356m, 1341w, 1227s, 1206s, 1171m, 1142w, 1123w, 1107w, 1070m, 1030m, 964m, 922w, 866w, 826w, 795w, 766w, 743w, 719w, 667w, 615w, 600w, 475m. <sup>1</sup>HNMR for **H<sub>3</sub>L** (DMSO-*d*<sub>6</sub>, 400 MHz) δ: 12.13 (s, 1H), 11.25 (s, 1H), 10.87 (s, 1H), 8.69 (s, 1H), 8.46 (s, 1H), 7.91 (d, 1H), 7.77 (d, 1H), 7.52 (t, 1H), 7.37 (t, 1H), 7.33(s,1H), 7.19(d, 1H), 7.06 (d, 1H), 6.89 (t, 1H), 3.83 (s, 3H).

Synthesis of Zn(II) complex **1** (**Zn(H<sub>2</sub>L)<sub>2</sub>·H<sub>2</sub>O**, ZnC<sub>38</sub>H<sub>32</sub>N<sub>4</sub>O<sub>9</sub>): A mixture of **H<sub>3</sub>L** (0.10 mmol, 0.0336 g), Zn(Ac)<sub>2</sub>·2H<sub>2</sub>O (0.05 mmol, 0.0110 g), 4 ml ultrapure water and 1ml tetrahydrofuran was sealed in a 25 mL Teflon-lined autoclave and heated at 80 °C for 48 h, cooled to room temperature. Yellow cube crystals suitable for X-ray crystallography were obtained. Washed three times with ethanol and filtered, and air-dried to obtain 0.0050 g crystals in a yield of 13.26%.

Synthesis of Zn-**H<sub>3</sub>L** complex aggregations (ZnC<sub>38</sub>H<sub>32</sub>N<sub>4</sub>O<sub>9</sub>): 10 ml of Zn(Ac)<sub>2</sub>·2H<sub>2</sub>O (0.10 mmol, 0.0220 g) aqueous solution was added to 100 ml of **H<sub>3</sub>L** (0.10 mmol, 0.0336 g) tetrahydrofuran solution and stirred for 5 hours. Then 390 ml water was slowly added to obtain THF/H<sub>2</sub>O=2/8(v/v) mixed solution, and the solution gradually became turbid and finally formed precipitate. After standing for one day, filtered and washed three times with water, and then air-dried to obtain 0.0303 g yellow powder in a yield of 80.37%. Anal. Calcd for ZnC<sub>38</sub>H<sub>32</sub>N<sub>4</sub>O<sub>9</sub> (%): C, 60.52; H, 4.28; N, 7.43. Found: C, 60.13; H, 4.49; N, 7.61.

Synthesis of Cd(II) complex **2** (**Cd<sub>2</sub>(HL')<sub>2</sub>py<sub>4</sub>**, Cd<sub>2</sub>C<sub>58</sub>H<sub>48</sub>N<sub>8</sub>O<sub>8</sub>): **H<sub>3</sub>L** (0.05 mmol, 0.0168 g) was dissolved in 5 ml pyridine with stirring, Cd(Ac)<sub>2</sub>·2H<sub>2</sub>O (0.05mmol, 0.0133 g) was added to the above solution and stirred for 3 hours, filtered and dried to obtain light yellow powder. Recrystallized with 5ml tetrahydrofuran, light yellow block crystals suitable for X-ray crystallography were obtained, air-dried to obtain 0.0193 g crystals in a yield of 63.91%. Anal. Calcd for Cd<sub>2</sub>C<sub>58</sub>H<sub>48</sub>N<sub>8</sub>O<sub>8</sub> (%): C, 57.58; H, 4.00; N, 9.26. Found: C, 57.26; H, 4.33; N, 9.57.

Synthesis of Cd(II) complex polycrystals (Cd<sub>2</sub>C<sub>38</sub>H<sub>28</sub>N<sub>4</sub>O<sub>8</sub>): A mixture of 1ml DMF solution of **H<sub>3</sub>L** (0.05 mmol, 0.0168 g), 1ml methanol solution of Cd(ClO<sub>4</sub>)<sub>2</sub>·6H<sub>2</sub>O (0.05 mmol,0.0210 g) and 6 ml methanol solution of acetic acid (0.10 mmol, 5.7 μL) was sealed in a 25 mL Teflon-lined autoclave and heated at 80 °C for 48 h, cooled to room temperature, yellow small polycrystals were obtained. Washed three times with methanol and filtered, and air-dried to obtain 0.0113 g crystals in a yield of 50.67%. Anal. Calcd for Cd<sub>2</sub>C<sub>38</sub>H<sub>28</sub>N<sub>4</sub>O<sub>8</sub> (%): C, 51.08; H, 3.16; N, 6.27. Found: C, 51.00; H, 3.41; N, 6.10.

Synthesis of Cd(II)-**H<sub>3</sub>L** complex aggregations (Cd<sub>2</sub>C<sub>38</sub>H<sub>28</sub>N<sub>4</sub>O<sub>8</sub>): 15 ml of Cd(ClO<sub>4</sub>)<sub>2</sub>·6H<sub>2</sub>O (0.15 mmol, 0.0618 g) aqueous solution (HEPES buffer solution, 20 mM, pH = 7.4) was added to 150 ml of **H<sub>3</sub>L** (0.15 mmol, 0.0504 g) tetrahydrofuran solution and stirred for 5 hours. Then 335 ml HEPES buffer was slowly added to obtain THF/HEPES=3/7(v/v) mixed solution, and the solution gradually became turbid and finally formed precipitate. After standing for one day, filtered and washed three times with water, and then air-dried to obtain 0.0520 g yellow powder in a yield of 77.61 %. Anal. Calcd for Cd<sub>2</sub>C<sub>38</sub>H<sub>28</sub>N<sub>4</sub>O<sub>8</sub> (%): C, 51.08; H, 3.16; N, 6.27. Found: C, 51.00; H, 3.41; N, 6.10.

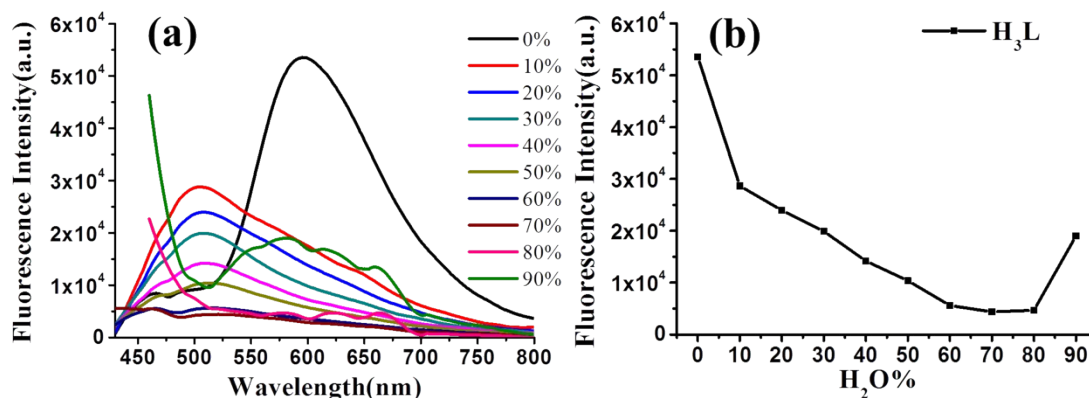

**Fig.S1** (a) Fluorescence spectra and (b) the maximum emission intensity change of  $H_3L$  (100 $\mu$ M) in THF/ $H_2O$  solvents containing 100–10% THF and 0–90% water,  $\lambda_{ex}$ =400 nm.

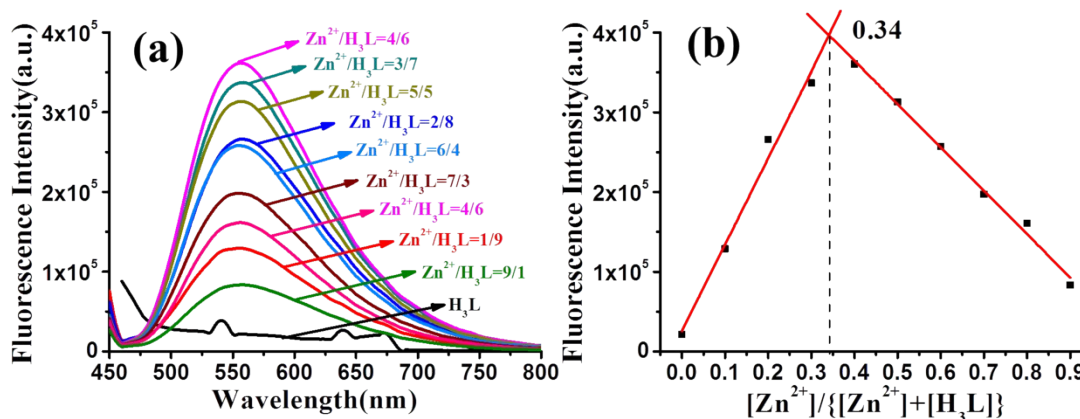

**Fig.S2** (a) Fluorescence spectra of  $H_3L$  and  $Zn^{2+}$  in THF/ $H_2O$  (v/v, 2/8), the total concentration of  $Zn^{2+}$  and  $H_3L$  was 100  $\mu$ M,  $\lambda_{ex}$ =440 nm; (b) Job's plot of  $Zn^{2+}$  vs  $H_3L$  in THF/ $H_2O$  (v/v, 2/8),  $\lambda_{em}$ =560 nm.

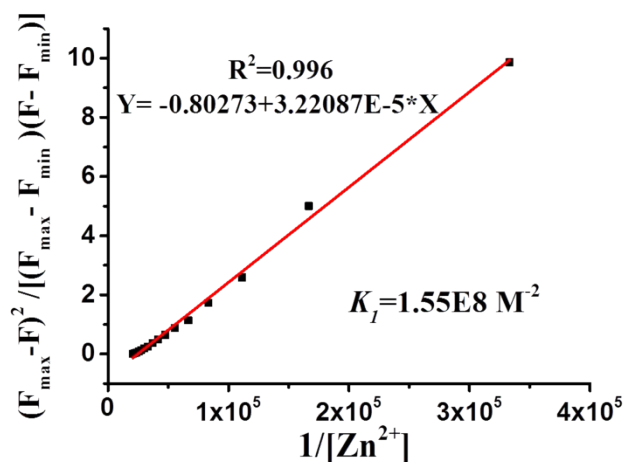

**Fig.S3** Association constant calculations by plotting  $(F_{max}-F_{min})^2 / [(F_{max}-F_{min})(F-F_{min})]$  vs  $1/[Zn^{2+}]$  with linear fitting as well to find out the binding constant of  $H_3L$  (100  $\mu$ M) with  $Zn^{2+}$ ,  $H_3L$  and  $Zn^{2+}$  assuming 2:1 stoichiometry for association in THF/  $H_2O$  (v/v=2/8) solvent,  $\lambda_{ex}$ =440 nm,  $\lambda_{em}$ =560 nm.

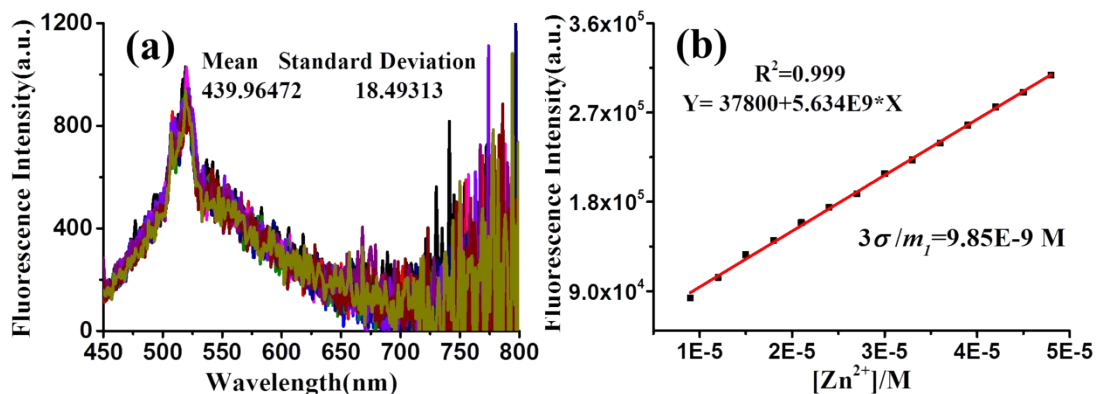

**Fig.S4** (a) The standard deviation of the blank measurement was determined by measuring the emission intensity of the  $H_3L$  in THF/ $H_2O$  ( $v/v=2/8$ ) without metal ions ten times. (b)The detection limit of  $H_3L$  ( $100 \mu M$ ) for  $Zn^{2+}$  was calculated by  $3\sigma/m$  formula based on the fluorescence titration data.

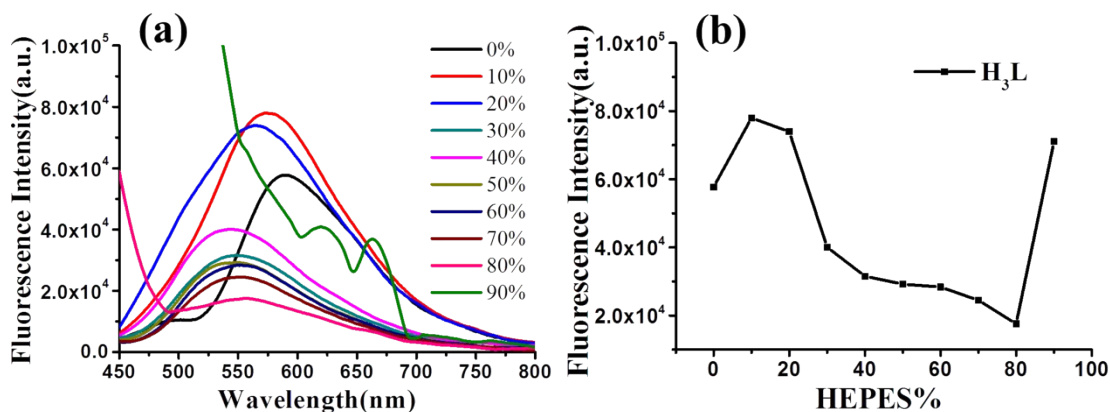

**Fig.S5** (a) Fluorescence spectra and (b) the maximum emission intensity change of  $H_3L$  ( $100 \mu M$ ) in THF/ HEPES solvents containing 100–10% THF and 0–90% HEPES buffer (water solution, 20 mM, pH = 7.42),  $\lambda_{ex}=430 \text{ nm}$ .

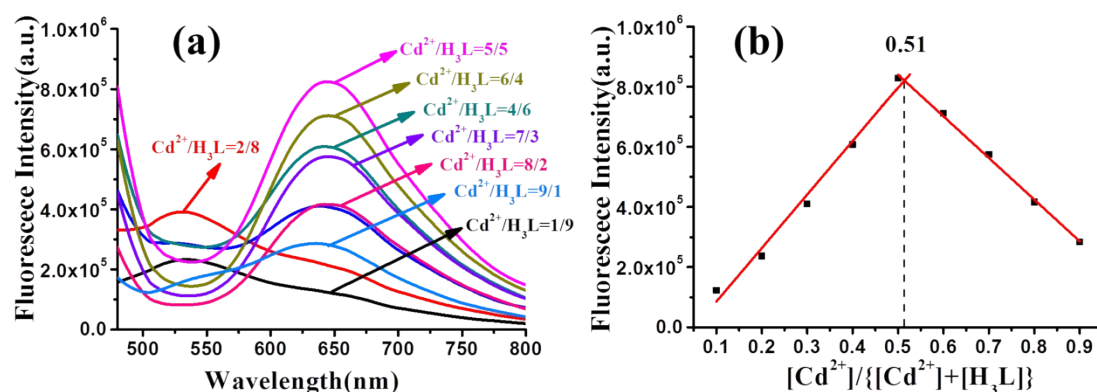

**Fig.S6** (a) Fluorescence spectra of  $H_3L$  and  $Cd^{2+}$  in THF/ HEPES aqueous buffer( $v/v, 3/7$ ) solvent, the total concentration of  $Cd^{2+}$  and  $H_3L$  was  $100 \mu M$ ,  $\lambda_{ex}=430 \text{ nm}$ ; (b) Job's plot of  $Cd^{2+}$  vs  $H_3L$  in THF/HEPES ( $v/v, 3/7$ ),  $\lambda_{em}=645 \text{ nm}$ .

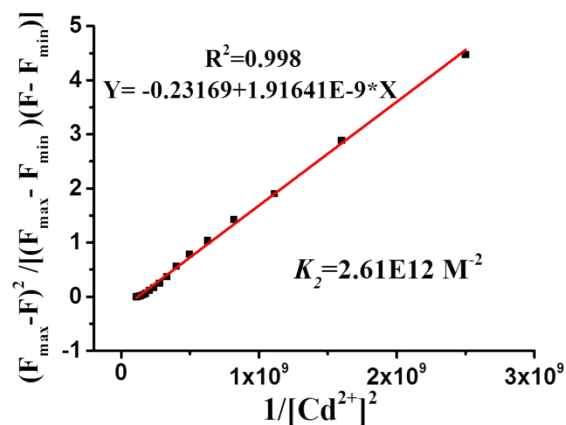

**Fig.S7** Association constant calculations by plotting  $(F_{\max} - F_{\min})^2 / [(F_{\max} - F_{\min})(F - F_{\min})]$  vs  $1/[\text{Cd}^{2+}]^2$  with linear fitting as well to find out the binding constant of  $\text{H}_3\text{L}$  (100  $\mu\text{M}$ ) with  $\text{Cd}^{2+}$ ,  $\text{H}_3\text{L}$  and  $\text{Cd}^{2+}$  assuming 2:2 stoichiometry for association in THF/ HEPES aqueous buffer (v/v, 3/7) solvent,  $\lambda_{\text{ex}}=430$  nm,  $\lambda_{\text{em}}=645$  nm.

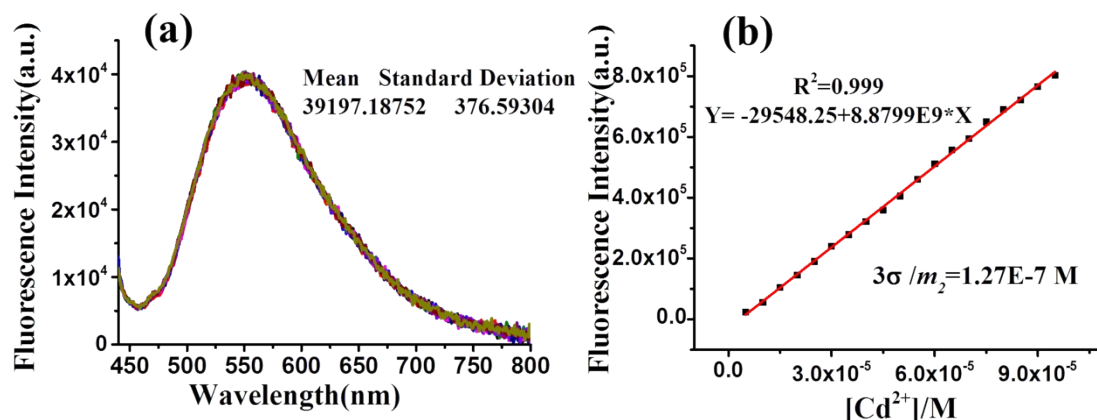

**Fig.S8** (a) The standard deviation of the blank measurement was determined by measuring the emission intensity of the  $\text{H}_3\text{L}$  in THF/HEPES (v/v, 3/7) without metal ions ten times. (b)The detection limit of  $\text{H}_3\text{L}$  (100  $\mu\text{M}$ ) for  $\text{Cd}^{2+}$  was calculated by  $3\sigma/m$  formula based on the fluorescence titration data.

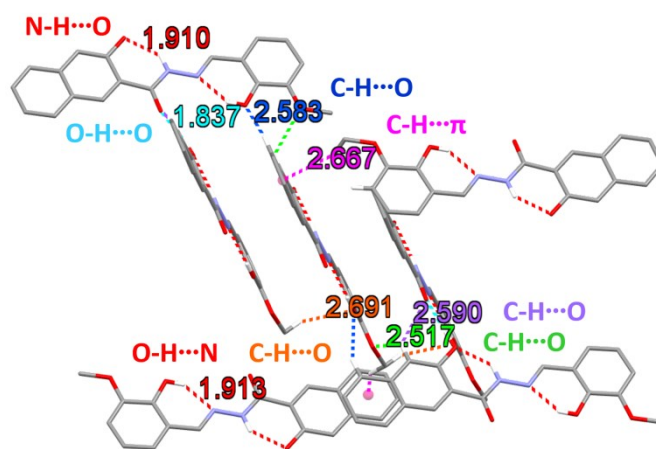

**Fig.S9** Intramolecular and intermolecular interactions observed in  $\text{H}_3\text{L}$ .

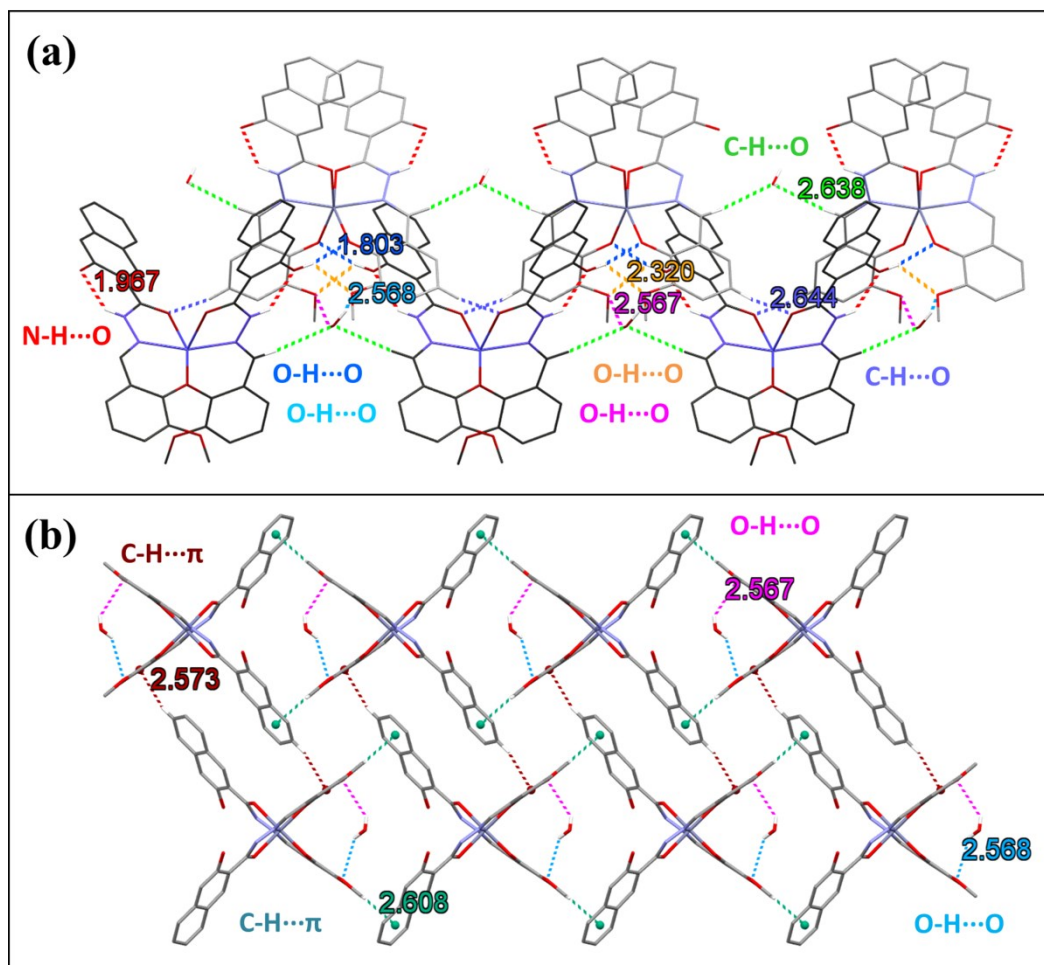

**Fig.S10** The “head to tail” molecular packing directed by the O-H...O, C-H...O and C-H...π intermolecular interactions in the Zn (II) complex **1**; (a) N-H...O intramolecular hydrogen bond, O-H...O and C-H...O intermolecular interactions (b) O-H...O and C-H...π intermolecular interactions observed in the Zn (II) complex **1**.

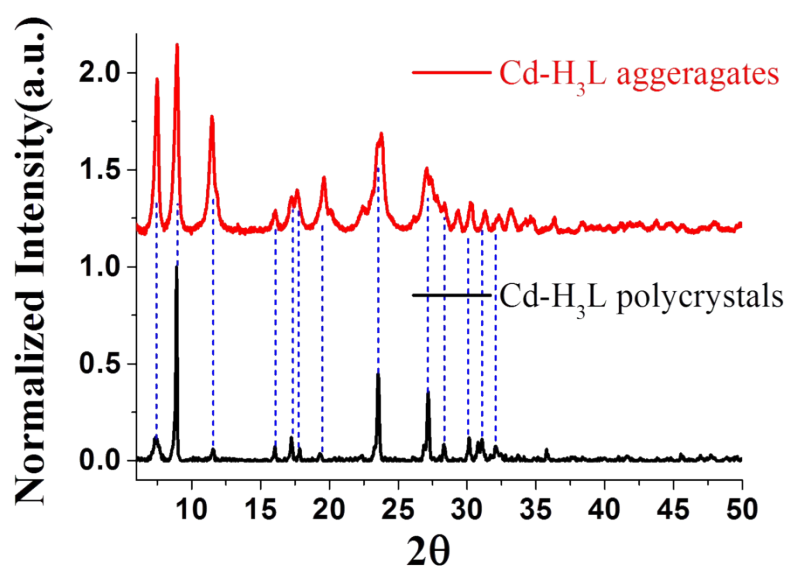

**Fig.S11** PXRD of Cd (II) complex polycrystals and Cd-H<sub>3</sub>L aggregates.

**Table.S1** Crystal data and structure refinement parameters of **H<sub>3</sub>L**, complex **(1)** and **(2)**

| Compound and Complex                          | <b>H<sub>3</sub>L</b>                                         | <b>1</b>                                                         | <b>2</b>                                                                      |
|-----------------------------------------------|---------------------------------------------------------------|------------------------------------------------------------------|-------------------------------------------------------------------------------|
| Empirical formula                             | C <sub>19</sub> H <sub>16</sub> N <sub>2</sub> O <sub>4</sub> | C <sub>38</sub> H <sub>32</sub> N <sub>4</sub> O <sub>9</sub> Zn | C <sub>58</sub> H <sub>48</sub> N <sub>8</sub> O <sub>8</sub> Cd <sub>2</sub> |
| Formula weight                                | 336.34                                                        | 754.04                                                           | 1209.84                                                                       |
| Temperature/K                                 | 100.02(10)                                                    | 100.00(10)                                                       | 100.01(10)                                                                    |
| Crystal system                                | Monoclinic                                                    | Orthorhombic                                                     | monoclinic                                                                    |
| Space group                                   | P2 <sub>1</sub> /n                                            | <i>Pbcn</i>                                                      | P2 <sub>1</sub> /n                                                            |
| a/Å                                           | 6.25880(10)                                                   | 12.4075(6)                                                       | 10.5367(3)                                                                    |
| b/Å                                           | 19.4126(4)                                                    | 11.7844(7)                                                       | 18.9744(5)                                                                    |
| c/Å                                           | 12.9577(3)                                                    | 23.1020(11)                                                      | 12.6319(4)                                                                    |
| α/°                                           | 90                                                            | 90                                                               | 90                                                                            |
| β/°                                           | 98.056(2)                                                     | 90                                                               | 92.946(3)                                                                     |
| γ/°                                           | 90                                                            | 90                                                               | 90                                                                            |
| Volume/Å <sup>3</sup>                         | 1558.82(5)                                                    | 3377.9(3)                                                        | 2522.13(13)                                                                   |
| Z                                             | 4                                                             | 4                                                                | 4                                                                             |
| ρ <sub>calc</sub> /cm <sup>3</sup>            | 1.433                                                         | 1.483                                                            | 3.168                                                                         |
| μ/mm <sup>-1</sup>                            | 0.842                                                         | 1.558                                                            | 14.601                                                                        |
| F(000)                                        | 704                                                           | 1560                                                             | 2448                                                                          |
| Crystal size/mm <sup>3</sup>                  | 0.30 × 0.20 × 0.15                                            | 0.15 × 0.15 × 0.15                                               | 0.2 × 0.1 × 0.1                                                               |
| Radiation                                     | CuKα (λ = 1.54184)                                            | CuKα (λ = 1.54184)                                               | CuKα (λ = 1.54184)                                                            |
| 2θ range for data collection/°                | 8.260 to 146.324                                              | 7.654 to 152.116                                                 | 8.416 to 144.06                                                               |
| Reflections collected                         | 5764                                                          | 11570                                                            | 10544                                                                         |
| R <sub>int</sub> /R <sub>sigma</sub>          | 0.0218/0.0267                                                 | 0.0393/ 0.0370                                                   | 0.0276/0.0369                                                                 |
| Data/restraints/parameters                    | 3028/0/229                                                    | 3372/0/238                                                       | 4846/0/345                                                                    |
| Goodness-of-fit on F <sup>2</sup>             | 1.066                                                         | 1.062                                                            | 1.063                                                                         |
| R <sub>1</sub> /wR <sub>2</sub> [ I >=2σ (I)] | 0.0391/0.1021                                                 | 0.0470/ 0.1332                                                   | 0.0297/0.0720                                                                 |
| R <sub>1</sub> /wR <sub>2</sub> [all data]    | 0.0434/0.1058                                                 | 0.0544/ 0.1414                                                   | 0.0344/0.0758                                                                 |
| Largest diff. peak/hole / e Å <sup>-3</sup>   | 0.27/-0.23                                                    | 0.89/-0.59                                                       | 0.70/-0.60                                                                    |



**Table.S2** Selected bond distances (Å) and angles (°) for **H<sub>3</sub>L**

---

| <b>H<sub>3</sub>L</b> |             |             |             |
|-----------------------|-------------|-------------|-------------|
| O1—C1                 | 1.3679 (16) | C5—C6       | 1.420 (2)   |
| O2—C14                | 1.3509 (16) | C6—C7       | 1.369 (2)   |
| O3—C11                | 1.2306 (16) | C7—C8       | 1.4157 (18) |
| O4—C15                | 1.3616 (16) | C8—C9       | 1.4133 (19) |
| O4—C19                | 1.4281 (16) | C9—C10      | 1.3731 (18) |
| N1—N2                 | 1.3687 (15) | C10—C11     | 1.4985 (18) |
| N1—C11                | 1.3506 (17) | C12—C13     | 1.4522 (19) |
| N2—C12                | 1.2853 (18) | C16—C17     | 1.398 (2)   |
| C1—C2                 | 1.3725 (19) | C17—C18     | 1.376 (2)   |
| C1—C10                | 1.4332 (17) | C13—C14     | 1.4031 (19) |
| C2—C3                 | 1.4105 (18) | C13—C18     | 1.4052 (19) |
| C3—C4                 | 1.4248 (18) | C14—C15     | 1.4096 (19) |
| C3—C8                 | 1.4242 (18) | C15—C16     | 1.3841 (19) |
| C4—C5                 | 1.3652 (19) | C11—N1—N2   | 120.31 (11) |
| O1—C1—C10             | 118.89 (11) | C12—N2—N1   | 115.82 (11) |
| O1—C1—C2              | 120.94 (11) | C15—O4—C19  | 116.85 (11) |
| C2—C1—C10             | 120.17 (12) | O3—C11—N1   | 122.78 (12) |
| C1—C2—C3              | 121.28 (12) | O3—C11—C10  | 121.33 (12) |
| C8—C3—C4              | 118.72 (12) | N1—C11—C10  | 115.90 (11) |
| C2—C3—C8              | 119.34 (12) | N2—C12—C13  | 121.37 (12) |
| C2—C3—C4              | 121.93 (12) | C14—C13—C12 | 121.53 (12) |
| C5—C4—C3              | 120.35 (12) | C14—C13—C18 | 119.49 (13) |
| C4—C5—C6              | 120.87 (13) | C18—C13—C12 | 118.98 (12) |
| C5—C6—C7              | 119.97 (13) | O2—C14—C15  | 117.57 (11) |
| C6—C7—C8              | 120.66 (12) | O2—C14—C13  | 123.08 (12) |
| C9—C8—C3              | 117.93 (12) | C13—C14—C15 | 119.35 (12) |
| C9—C8—C7              | 122.65 (12) | O4—C15—C14  | 114.40 (12) |
| C7—C8—C3              | 119.40 (12) | O4—C15—C16  | 125.31 (12) |
| C8—C9—C10             | 122.77 (12) | C16—C15—C14 | 120.28 (12) |
| C1—C10—C9             | 118.46 (12) | C15—C16—C17 | 120.04 (13) |
| C1—C10—C11            | 125.62 (12) | C18—C17—C16 | 120.31 (13) |
| C9—C10—C11            | 115.92 (11) | C17—C18—C13 | 120.52 (13) |

---

**Table.S3** Selected bond distances (Å) and angels (°) for Zn(II) complex (**1**)

| <b>1</b>                             |             |                                      |             |
|--------------------------------------|-------------|--------------------------------------|-------------|
| Zn1—O2                               | 2.0506 (17) | C3—C4                                | 1.416 (4)   |
| Zn1—O2 <sup>i</sup>                  | 2.0506 (17) | C3—C8                                | 1.424 (3)   |
| Zn1—O3                               | 2.2085 (18) | C4—C5                                | 1.370 (4)   |
| Zn1—O3 <sup>i</sup>                  | 2.2085 (18) | C5—C6                                | 1.416 (4)   |
| Zn1—N2                               | 2.102 (2)   | C6—C7                                | 1.367 (4)   |
| Zn1—N2 <sup>i</sup>                  | 2.102 (2)   | C7—C8                                | 1.421 (3)   |
| O1—C1                                | 1.353 (3)   | C8—C9                                | 1.413 (3)   |
| O2—C14                               | 1.323 (3)   | C9—C10                               | 1.377 (3)   |
| O3—C11                               | 1.245 (3)   | C10—C11                              | 1.489 (3)   |
| O4—C15                               | 1.371 (3)   | C12—C13                              | 1.438 (3)   |
| O4—C19                               | 1.420 (4)   | C13—C14                              | 1.413 (3)   |
| N1—N2                                | 1.380 (3)   | C13—C18                              | 1.412 (3)   |
| N1—C11                               | 1.340 (3)   | C14—C15                              | 1.423 (3)   |
| N2—C12                               | 1.295 (3)   | C15—C16                              | 1.372 (4)   |
| C1—C2                                | 1.375 (3)   | C16—C17                              | 1.404 (4)   |
| C1—C10                               | 1.432 (3)   | C17—C18                              | 1.366 (4)   |
| C2—C3                                | 1.414 (3)   | O2—Zn1—N2                            | 85.27 (7)   |
| O2 <sup>i</sup> —Zn1—O2              | 90.20 (10)  | O2 <sup>i</sup> —Zn1—N2 <sup>i</sup> | 85.27 (7)   |
| O2—Zn1—O3 <sup>i</sup>               | 91.85 (7)   | O3—Zn1—O3 <sup>i</sup>               | 93.56 (10)  |
| O2 <sup>i</sup> —Zn1—O3              | 91.85 (7)   | N2—Zn1—O3 <sup>i</sup>               | 93.84 (7)   |
| O2—Zn1—O3                            | 159.14 (7)  | N2 <sup>i</sup> —Zn1—O3              | 93.85 (7)   |
| O2 <sup>i</sup> —Zn1—O3 <sup>i</sup> | 159.14 (7)  | N2—Zn1—O3                            | 74.28 (7)   |
| O2 <sup>i</sup> —Zn1—N2              | 107.01 (7)  | N2 <sup>i</sup> —Zn1—O3 <sup>i</sup> | 74.28 (7)   |
| O2—Zn1—N2 <sup>i</sup>               | 107.01 (7)  | N2 <sup>i</sup> —Zn1—N2              | 162.88 (12) |

<sup>i</sup>[1-X,+Y,3/2-Z]

**Table.S4** Selected bond distances (Å) and angles (°) for Cd(II) complex (**2**)

|                                      |             |                        |            |
|--------------------------------------|-------------|------------------------|------------|
| Cd1—O2                               | 2.3273 (18) | C14—C15                | 1.416 (4)  |
| Cd1—O2 <sup>i</sup>                  | 2.3396 (18) | C15—C16                | 1.386 (4)  |
| Cd1—O3                               | 2.3233 (19) | C16—C17                | 1.391 (4)  |
| Cd1—O4 <sup>i</sup>                  | 2.4859 (19) | C17—C18                | 1.369 (4)  |
| Cd1—N4                               | 2.378 (2)   | C20—C21                | 1.384 (4)  |
| Cd1—N3                               | 2.389 (2)   | C21—C22                | 1.378 (4)  |
| Cd1—N2                               | 2.368 (2)   | C22—C23                | 1.388 (5)  |
| O2—Cd1 <sup>i</sup>                  | 2.3396 (18) | C23—C24                | 1.386 (4)  |
| O4—Cd1 <sup>i</sup>                  | 2.4860 (19) | C25—C26                | 1.385 (4)  |
| C1—C2                                | 1.374 (4)   | C26—C27                | 1.371 (5)  |
| C1—C10                               | 1.434 (4)   | C27—C28                | 1.375 (5)  |
| C2—C3                                | 1.413 (4)   | C28—C29                | 1.382 (4)  |
| C3—C4                                | 1.415 (4)   | N2—N1                  | 1.404 (3)  |
| C3—C8                                | 1.432 (4)   | N1—C11                 | 1.330 (4)  |
| C4—C5                                | 1.368 (5)   | N2—C12                 | 1.293 (4)  |
| C5—C6                                | 1.409 (5)   | N3—C20                 | 1.342 (4)  |
| C6—C7                                | 1.365 (4)   | N3—C24                 | 1.342 (4)  |
| C7—C8                                | 1.417 (4)   | N4—C29                 | 1.347 (4)  |
| C8—C9                                | 1.417 (4)   | N4—C25                 | 1.335 (4)  |
| C9—C10                               | 1.371 (4)   | O1—C1                  | 1.351 (4)  |
| C10—C11                              | 1.499 (4)   | O2—C14                 | 1.323 (3)  |
| C12—C13                              | 1.444 (4)   | O3—C11                 | 1.265 (3)  |
| C13—C14                              | 1.420 (4)   | O4—C15                 | 1.373 (3)  |
| C13—C18                              | 1.413 (4)   | O4—C19                 | 1.430 (3)  |
| O2—Cd1—O2 <sup>i</sup>               | 76.20 (7)   | O3—Cd1—O4 <sup>i</sup> | 72.91 (7)  |
| O2—Cd1—O4 <sup>i</sup>               | 142.39 (6)  | O3—Cd1—N4              | 88.06 (8)  |
| O2 <sup>i</sup> —Cd1—O4 <sup>i</sup> | 66.22 (6)   | O3—Cd1—N3              | 87.66 (8)  |
| O2 <sup>i</sup> —Cd1—N4              | 85.69 (7)   | O3—Cd1—N2              | 68.31 (7)  |
| O2—Cd1—N4                            | 94.80 (7)   | N4—Cd1—O4 <sup>i</sup> | 84.17 (7)  |
| O2 <sup>i</sup> —Cd1—N3              | 87.09 (7)   | N4—Cd1—N3              | 163.44 (8) |
| O2—Cd1—N3                            | 97.93 (7)   | N3—Cd1—O4 <sup>i</sup> | 79.28 (7)  |
| O2—Cd1—N2                            | 76.67 (7)   | N2—Cd1—O4 <sup>i</sup> | 140.48 (7) |
| O2 <sup>i</sup> —Cd1—N2              | 152.39 (7)  | N2—Cd1—N4              | 101.62 (8) |
| O3—Cd1—O2 <sup>i</sup>               | 139.06 (7)  | N2—Cd1—N3              | 91.63 (8)  |
| O3—Cd1—O2                            | 144.69 (7)  |                        |            |

<sup>i</sup>[-x+1, -y+1, -z+1]

**Table.S5** Intramolecular and intermolecular interactions for **H<sub>3</sub>L**

| Type  | D-H...A                       | D-H(Å) | H...A(Å) | D..A(Å) | D-H-A(°) |
|-------|-------------------------------|--------|----------|---------|----------|
| Intra | O2-H2...N2                    | 0.82   | 1.913    | 2.631   | 146      |
| Intra | N1-H1A...O1                   | 0.86   | 1.910    | 2.618   | 139      |
| Inter | O1-H1...O3 <sup>i</sup>       | 0.82   | 1.837    | 2.654   | 174      |
| Inter | C2-H2A...O3 <sup>i</sup>      | 0.93   | 2.590    | 3.263   | 130      |
| Inter | C2-H2A...O4 <sup>ii</sup>     | 0.93   | 2.517    | 3.104   | 121      |
| Inter | C4-H4...O2 <sup>ii</sup>      | 0.93   | 2.583    | 3.440   | 153      |
| Inter | C19-H19B...O2 <sup>ii</sup>   | 0.96   | 2.691    | 3.565   | 152      |
| Inter | C19-H19C...Cg2 <sup>iii</sup> | 0.96   | 2.667    | 3.429   | 137      |

<sup>i</sup>[-1/2+x,1/2-y,-1/2+z], <sup>ii</sup>[-3/2+x,1/2-y,-1/2+z], <sup>iii</sup>[1/2-X,-1/2+Y,1/2-Z]

**Table.S6** Intramolecular and intermolecular interactions for Zn(II) complex (**1**)

| Type  | D-H...A                     | D-H (Å) | H...A (Å) | D..A (Å) | D-H-A(°) |
|-------|-----------------------------|---------|-----------|----------|----------|
| Intra | N1-H1A...O1                 | 0.86    | 1.967     | 2.627    | 133      |
| Inter | O1-H1...O2 <sup>i</sup>     | 0.82    | 1.803     | 2.604    | 165      |
| Inter | O1-H1...O4 <sup>i</sup>     | 0.82    | 2.320     | 2.796    | 118      |
| Inter | O5-H5A...O4 <sup>ii</sup>   | 0.84    | 2.568     | 3.173    | 130      |
| Inter | O5-H5B...O4 <sup>iii</sup>  | 0.73    | 2.567     | 3.173    | 141      |
| Inter | C12-H12...O5 <sup>i</sup>   | 0.93    | 2.638     | 3.556    | 169      |
| Inter | C15-H15...O3 <sup>i</sup>   | 0.93    | 2.644     | 3.282    | 127      |
| Inter | C5-H5...Cg7 <sup>iv</sup>   | 0.93    | 2.573     | 3.447    | 157      |
| Inter | C19-H19C...Cg7 <sup>v</sup> | 0.93    | 2.608     | 3.282    | 128      |

<sup>i</sup>[1/2+x,-1/2+y,3/2-z], <sup>ii</sup>[1-x,-1+y,3/2-z], <sup>iii</sup>[x,-1+y,z], <sup>iv</sup>[X,1-Y,-1/2+Z], <sup>v</sup>[1-X,1+Y,3/2-Z]

## References

- 1 G. M. Sheldrick, *Acta Crystallogr. A Found. Adv.*, 2015, **71**, 3-8.
- 2 G. M. Sheldrick, *Acta Crystallogr. C Struct. Chem.*, 2015, **71**, 3-8.
- 3 O. V. Dolomanov, L. J. Bourhis, R. J. Gildea, J. A. K. Howard and H. Puschmann, *J. Appl. Crystallogr.*, 2009, **42**, 339-341.
